# Supplementary material for: The diagnostic value of serum insulin-like growth factor binding protein 7 in gastric cancer
Source: PeerJ. 2023 Jun 5;11:e15419. doi: 10.7717/peerj.15419 (PMC10249617; doi:10.7717/peerj.15419)
Supplement: Supplemental Information 1 [file peerj-11-15419-s001.xlsx]

## Sheet: training cohort NC
ID	age	gender	IGFBP7(ng/ml)
H001	54	male	2.01635
H002	56	male	2.94209
H003	45	male	1.8406
H004	52	male	1.84779
H005	50	female	1.62623
H006	65	female	1.89601
H007	45	female	1.72327
H008	68	female	1.87252
H009	65	male	1.86532
H010	56	male	1.77033
H011	56	female	1.86313
H012	46	male	1.8816
H013	47	male	2.07188
H014	55	male	1.85186
H015	56	male	1.70832
H016	70	male	1.80935
H017	47	male	1.98371
H018	55	male	1.84892
H019	61	female	1.73777
H020	71	female	1.90705
H021	57	female	1.81145
H022	79	male	1.8849
H023	49	female	1.82651
H024	63	male	2.07725
H025	59	female	2.05347
H026	46	male	2.86276
H027	72	female	1.9862
H028	52	female	2.25497
H029	58	female	2.24393
H030	51	female	1.86404
H031	62	male	2.62142
H032	61	female	1.83506
H033	48	female	1.96905
H034	50	male	1.87447
H035	69	male	1.89168
H036	46	female	1.9122
H037	47	female	1.81694
H038	57	male	1.71577
H039	54	female	1.60695
H040	55	female	1.55817
H041	46	female	1.86507
H042	61	male	2.1764
H043	47	female	2.12806
H044	65	female	1.89455
H045	74	female	1.96616
H046	52	female	2.35815
H047	63	male	2.0416
H048	83	female	2.00298
H049	48	female	2.00961
H050	46	male	1.51322
H051	60	female	1.648
H052	46	male	1.61411
H053	45	female	1.78526
H054	56	female	1.89783
H055	46	female	1.5649
H056	61	male	1.78039
H057	51	male	1.9658
H058	55	female	1.71708
H059	53	female	1.5173
H060	55	male	1.70671
H061	56	female	1.58797
H062	46	female	1.75257
H063	63	female	1.81322
H064	54	female	2.03998
H065	48	male	1.88008
H066	69	female	2.0719
H067	65	female	2.20171
H068	49	male	1.569
H069	55	female	2.02513
H070	52	female	2.25232
H071	45	male	1.65615
H072	47	male	2.77078
H073	53	female	1.83969
H074	62	male	1.69763
H075	70	female	1.54099
H076	54	male	1.81756
H077	49	female	1.96537
H078	48	female	1.68077
H079	45	male	1.88094
H080	46	male	1.92095
H081	49	male	2.25232
H082	50	male	2.16568
H083	46	male	1.90616
H084	61	male	1.6497
H085	56	male	1.8463
H086	61	male	1.152
H087	50	male	1.0347
H088	53	male	1.6953
H089	49	male	1.5927
H090	69	male	1.2057
H091	48	male	1.9755
H092	58	male	2.1798
H093	62	male	1.1199
H094	50	male	1.6839
H095	67	male	1.0137
H096	46	male	1.4916
H097	53	male	1.3365
H098	49	male	1.1412
H099	57	male	1.7067
H100	53	male	1.5008

## Sheet: validation cohort NC
ID	age	gender	IGFBP7(ng/ml)
N395s	75	male	2.8791
N396s	44	male	1.9755
N397s	47	female	1.9755
N398s	46	female	1.6953
N399s	50	female	2.541
N401s	44	female	3.5133
N402s	43	male	2.2164
N403s	58	male	2.8791
N405s	40	male	1.9161
N406s	41	female	1.5252
N407s	42	female	1.5252
N408s	44	male	1.3254
N409s	68	female	1.6155
N410s	67	female	1.4304
N411s	41	male	2.2041
N412s	42	female	1.2273
N413s	46	male	1.7877
N414s	41	female	1.9281
N415s	43	male	1.6155
N436s	57	female	2.2656
N437s	52	female	2.9994
N438s	55	male	3.2454
N439s	61	female	2.4522
N440s	53	female	2.1555
N441s	48	male	1.8225
N442s	51	female	1.4916
N443s	51	female	2.3148
N444s		female	1.3803
N445s	43	male	2.2287
N446s		female	1.5927
N447s	63	male	1.3803
N448s	65	male	2.6952
N449s	43	male	1.8108
N450s	76	male	2.241
N451s	61	male	2.0112
N468s	58	male	2.3646
N469s	58	male	3.5706
N470s	51	male	1.9161
N471s	49	male	1.8693
N472s	44	male	1.7067
N473s	47	male	2.2779
N474s	58	male	1.6383
N475s	48	male	2.9859
N476s	52	male	2.1798
N477s	53	male	2.9589
N478s	47	male	2.3148
N479s	46	female	1.7877
N480s	46	male	1.452
N481s	41	female	2.1192
N482s	53	male	2.4396
N483s	46	male	1.3365
N485s	45	male	2.2902
N486s	46	male	2.4273
N487s	51	male	2.0112
N488s	43	male	1.6497

## Sheet: training cohort GC
ID	age	gender	IGFBP7(ng/ml)	T	N	M	TNM	LAUREN type
W001	58	male	1.59673	4	2	1	IVB	intestinal
W003	40	female	1.42253	3	3a	0	IIIB	diffuse
W004	62	male	1.33182	3	1	0	IIB	mixed
W005	72	male	1.40148	1	0	0	IA	intestinal
W006	36	female	1.46	4a	2	0	IIIA	diffuse
W007	66	male	1.56259	4a	3	1	IVB	intestinal
W008	65	male	1.3956	3	0	0	IIA	diffuse
W009	57	female	1.79374	4a	3a	0	IIIB	diffuse
W010	36	female	1.65948	2	0	0	IB	diffuse
W012	60	male	1.88786	4a	3a	0	IIIB	mixed
W014	60	male	2.06682	3	1	0	IIB	intestinal
W016	34	female	1.6253	4b	2	1	IVB	diffuse
W017	60	male	1.6968	3	1	0	IIB	mixed
W018	41	male	1.66414	4a	3b	0	IIIC	mixed
W019	50	female	1.26061	1a	0	0	IA	diffuse
W020	63	male	1.6573	4b	2	1	IV	diffuse
W021	56	male	1.5958	4a	2	1	IV	intestinal
W022	45	male	1.90918	3	0	1	IV	intestinal
W023	33	male	1.93459	4a	2	0	IIIA	mixed
W024	43	female	2.05735	2	3b	0	IIIB	diffuse
W027	67	male	1.8056	2	0	0	IB	intestinal
W029	46	female	1.81653	1b	0	0	IA	diffuse
W031	50	male	1.58245	3	3b	0	IIIC	mixed
W032	64	male	1.59331	2	1	0	IIA	intestinal
W033	54	female	1.52941	3	3b	1	IV	mixed
W035	72	female	1.79342	4a	2	0	IIIA	intestinal
W036	76	male	1.72514	3	1	0	IIB	intestinal
W038	63	female	1.86313	2	3b	1	IVB	diffuse
W039	36	female	1.61877	3	3b	0	IIIC	mixed
W040	69	male	1.52848	3	3a	0	IIIB	intestinal
W041	51	male	1.40798	3	0	0	IIA	diffuse
W042	64	male	1.54554	3	0	0	IIA	intestinal
W043	51	female	1.46093	3	3b	0	IIIC	mixed
W044	35	male	1.71673	3	3b	0	IIIC	diffuse
W045	46	female	1.36154	4b	3a	0	IIIC	diffuse
W046	48	female	1.44916	1b	0	0	IA	diffuse
W047	48	male	1.84717	4	3a	1	IV	diffuse
W048	32	female	1.7694	3	0	0	IIA	diffuse
W049	50	female	1.75817	3	1	0	IIB	mixed
W050	54	male	1.73074	1b	1	0	IB	intestinal
W051	54	female	1.82778	4b	1	0	III	diffuse
W052	51	male	1.58183	4b	3	1	IVB	intestinal
W053	61	male	1.52693	3	1	0	IIB	diffuse
W054	65	male	1.74632	3	3a	0	IIIB	diffuse
W055	46	female	1.65451	1b	1	0	IB	intestinal
W056	67	male	1.44514	2	0	0	IB	intestinal
W057	44	male	1.6138	1a	0	0	IA	diffuse
W058	65	male	1.57811	1	3a	0	IIB	mixed
W060	40	female	1.75879	4a	0	1	IV	mixed
W061	62	male	1.65668	1a	0	0	IA	diffuse
W062	51	male	1.43027	3	0	0	IIA	mixed
W063	67	female	1.81278	4a	3	0	III	intestinal
W064	65	male	1.29529	4	1	0	III	intestinal
W065	54	male	1.38476	2	0	0	IB	diffuse
W066	28	female	1.70241	3	2	0	IIIA	diffuse
W067	57	male	1.44638	2	0	0	IB	intestinal
W068	34	female	1.38074	3	2	0	III	diffuse
W070	62	female	1.51763	4a	0	0	II	diffuse
W071	42	male	1.55391	4a	2	1	IVB	intestinal
W072	39	male	1.53592	2	2	0	IIB	mixed
W073	64	male	1.38631	3	2	1	IVB	mixed
W074	51	female	1.34558	3	3b	0	IIIC	mixed
W075	63	male	1.41437	1a	0	0	IA	intestinal
W076	35	male	1.46461	3	0	0	IIA	diffuse
W077	69	male	1.67067	4b	3	1	IV	diffuse
W078	54	male	1.59653	4a	3a	0	IIIB	diffuse
W079	78	male	1.49161	3	3a	0	IIIB	intestinal
W081	35	male	1.64429	3	0	0	IIA	diffuse
W083	72	male	1.59058	1b	0	0	IA	intestinal
W084	38	female	1.77494	3	0	0	IIA	diffuse
W085	42	male	1.38763	3	3b	0	IIIC	diffuse
W086	44	male	2.03183	4a	2	1	IV	diffuse
W087	64	male	1.39189	3	0	0	IIA	intestinal
W088	54	female	1.48652	3	3b	1	IV	mixed
W089	63	female	1.44276	3	1	0	IIB	diffuse
W092	36	female	1.47986	4b	1	1	IV	diffuse
W093	50	female	1.8849	is	0	0	0	diffuse
W094	53	male	1.62914	3	0	0	IIA	intestinal
W095	63	male	1.69833	4a	1	0	IIIA	mixed
W096	43	female	1.44822	3	2	0	IIIA	diffuse
W097	70	male	1.38338	3	3a	0	IIIB	intestinal
W098	78	male	1.41515	3	2	0	III	diffuse
W100	49	female	1.25379	3	3b	0	IIIC	diffuse
W101	69	male	1.40351	4b	2	1	IV	diffuse
W102	70	male	1.47243	3	3a	0	IIIB	mixed
W103	57	male	1.42292	4a	3a	0	IIIB	mixed
W104	73	male	1.49632	4a	3b	0	IIIC	intestinal
W105	64	male	1.49436	4	3	1	IVB	intestinal
W106	70	male	1.42137	1	0	0	IA	intestinal
W107	53	male	1.51045	1a	0	0	IA	diffuse
W108	59	male	1.62396	2	0	0	IB	intestinal
W109	53	female	2.49666	is	2	0	IIA	diffuse
W110	67	male	1.29916	3	3a	0	IIIB	diffuse
W111	48	female	1.74382	4a	3b	0	IIIC	mixed
W113	17	male	1.54075	4a	3	1	IV	mixed
W114	51	male	1.52342	2	0	0	IB	diffuse
W115	48	male	1.47243	3	3b	0	IIIC	diffuse
W116	44	male	1.51084	3	3a	0	IIIB	diffuse
W118	74	male	1.525	4a	3	0	III	intestinal
W119	57	female	1.32099	3	2	0	IIIA	diffuse
W120	59	female	1.78912	4b	2	1	IV	diffuse
W121	68	male	1.74301	3	0	0	IIB	intestinal
W122	67	male	1.56247	4a	3	0	III	mixed
W123	56	male	1.69231	4a	3b	0	IIIC	diffuse
W124	49	male	1.40157	4a	0	0	IIB	mixed
W125	35	female	1.54785	1	1	0	IB	diffuse
W126	60	male	1.57513	is	0	1	IV	intestinal
W127	66	male	1.55299	3	3a	0	IIIB	mixed
W128	34	female	1.53878	1a	0	0	IA	diffuse
W129	72	male	1.70757	4a	0	0	IIB	mixed
W130	42	female	1.39615	4a	3b	0	IIIC	diffuse
W132	55	male	1.45368	4a	3b	0	IIIC	mixed
W133	67	female	1.66187	1a	0	0	IA	intestinal
W134	70	male	1.44861	3	2	0	IIIA	mixed
W135	48	female	1.47087	4a	2	0	IIIA	mixed
W136	63	male	1.42486	2	0	0	IB	intestinal
W138	64	male	1.27854	3	1	0	IIB	intestinal
W139	48	male	1.46383	4b	2	1	IVB	mixed
W140	66	male	1.42642	1b	0	0	IA	intestinal
W141	55	male	1.78729	4a	1	0	IIIA	intestinal
W142	67	male	2.06659	3	2	1	IVB	intestinal
W143	68	male	1.59225	1a	0	0	IA	mixed
W144	65	female	1.83934	3	3b	0	IIIC	mixed
W145	69	male	1.61849	4b	3a	1	IVB	intestinal
W146	62	male	1.58034	4	2	0	III	diffuse
W147	66	male	1.40227	1b	1	0	IB	intestinal
W149	49	male	1.75975	is	0	0	0	mixed
W152	65	male	1.398	3	1	0	II	diffuse
W153	78	female	1.41236	4b	2	1	IV	diffuse
W156	57	male	1.71215	2	3b	0	IIIB	diffuse
W157	75	male	1.41703	1b	0	0	IA	intestinal
W158	51	male	1.74278	4	3	1	IV	diffuse
W159	50	male	1.31087	2	0	0	IB	diffuse
W160	76	male	1.33237	3	2	0	IIIA	intestinal
W161	63	male	1.54908	4a	2	1	IV	mixed
W162	65	male	1.6488	4a	1	0	III	intestinal
W163	63	female	1.6664	2	0	0	IB	diffuse
W164	26	female	1.7812	3	3a	0	IIIB	diffuse
W165	46	male	1.54434	is	0	0	0	intestinal
W166	43	female	1.77067	4a	3b	0	IIIC	diffuse
W167	66	male	1.57678	4b	3	0	IVA	mixed
W168	55	male	1.60059	3	1	0	II	intestinal
W169	61	male	1.48847	3	1	0	IIB	mixed
W170	67	male	1.68282	1b	0	0	IA	intestinal
W171	25	male	1.55066	3	2	1	IV	mixed
W172	68	male	1.26425	4b	3	1	IV	diffuse
W173	47	male	1.91384	4a	2	1	IV	mixed
W174	36	female	1.74479	4a	1	1	IV	mixed
W175	68	female	1.8145	3	1	0	IIB	mixed
W176	67	female	1.78161	3	1	0	IIB	intestinal
W177	49	female	1.7452	1a	0	0	IA	intestinal
W178	63	male	1.75651	4	2	0	III	intestinal
W179	51	female	2.16208	1b	1	0	IB	intestinal
W182	40	female	1.75409	4a	2	1	IV	diffuse
W184	32	female	1.72382	3	2	0	IIIA	intestinal
W185	36	female	1.87325	4a	3b	0	IIIC	diffuse
W186	56	male	2.00132	1b	3a	0	IIB	intestinal
W187	70	male	1.72261	3	2	1	IVB	intestinal
W188	47	female	1.86629	4a	0	0	IIB	diffuse
W189	67	male	1.69446	1b	0	0	IA	intestinal
W190	61	female	1.82223	4a	3b	0	IIIC	intestinal
W191	62	female	1.42792	3	3b	0	IIIC	diffuse
W192	58	male	1.59304	4a	3a	0	IIIB	mixed
W193	54	male	1.48769	2	0	0	IB	intestinal
W194	69	female	1.46693	4a	3b	1	IV	diffuse
W195	76	male	1.52896	4a	3	0	III	mixed
W196	40	female	1.37825	4a	3b	0	IIIC	diffuse
W197	65	male	1.69888	1a	0	0	IA	mixed
W198	35	female	1.92412	3	0	0	IIA	diffuse

## Sheet: validation cohort GC
ID	gender	age	IGFBP7(ng/ml)	T	N	M	TNM	LAUREN type
S001	female	67	1.84099	4	2	0	III	diffuse
S002	male	57	1.40328	3	3	0	III	intestinal
S004	female	43	1.37104	1	3	1	IVB	diffuse
S005	male	56	1.27178	3	0	0	IIA	intestinal
S007	male	48	1.74131	4	3	1	IVB	diffuse
S008	male	49	1.38694	3	1	0	IIB	mixed
S009	male	63	1.70541	4	3	0	IIIC	diffuse
S010	male	60	1.95752	3	0	0	IIA	intestinal
S011	male	62	1.41102	3	2	0	IIIA	intestinal
S012	male	47	2.27966	4a	2	0	IIIA	diffuse
S013	male	64	1.88225	2	1	0	IIA	intestinal
S014	male	58	1.61471	3	2	1	IV	intestinal
S015	female	55	1.55348	3	2	1	IVB	diffuse
S016	male	66	1.83014	4a	3b	0	IIIC	intestinal
S017	male	52	1.58883	1	2	0	IIA	intestinal
S019	female	65	1.68163	3	0	0	IIA	intestinal
S020	male	62	1.49792	4a	2	0	IIIA	intestinal
S021	female	47	1.7504	4b	0	0	IVA	diffuse
S023	male	54	1.64665	3	0	0	IIA	diffuse
S024	male	60	1.85228	4	2	0	III	diffuse
S025	female	46	1.46995	4b	2	0	IIIB	mixed
S026	male	54	1.59185	4	3	1	IVB	diffuse
S027	male	47	1.66219	3	2	0	IIIA	intestinal
S028	male	49	2.09597	4a	3b	0	IIIC	diffuse
S029	male	59	2.02033	1	0	0	IA	intestinal
S030	male	67	1.52591	1b	0	0	IA	mixed
S031	male	59	1.38823	4a	1	0	IIIA	mixed
S032	female	38	1.51988	3	0	0	IIA	intestinal
S033	female	55	1.4721	4a	2	0	IIIA	diffuse
S034	male	50	1.60047	3	3	0	III	mixed
S036	male	67	1.46521	1a	0	0	IA	intestinal
S037	female	45	1.73482	4b	1	1	IVB	diffuse
S038	female	52	1.65788	2	2	0	IIB	mixed
S039	female	61	2.16963	3	3b	0	IIIC	mixed
S040	male	67	2.58118	3	2	0	IIIA	mixed
S041	male	72	1.58193	3	1	1	IVB	intestinal
S042	female	58	1.87964	4	0	1	IVB	diffuse
S043	female	56	1.59659	4a	3a	0	IIIB	mixed
S045	female	31	1.39683	3	1	0	III	diffuse
S046	male	78	1.38393	4b	3	0	IVA	mixed
S047	female	60	1.55047	3	3	0	IIIB	intestinal
S048	male	60	1.48071	3	3a	0	IIIB	diffuse
S049	male	52	1.44886	4b	3	1	IVB	diffuse
S050	male	61	1.69763	2	2	0	IIB	mixed
S051	female	45	1.50912	3	2	0	IIIA	mixed
S052	male	54	1.33666	4	3	1	IVB	diffuse
S053	male	52	1.79762	4	3	1	IVB	diffuse
S054	female	66	1.3835	2	0	0	I	diffuse
S055	female	53	1.60694	2	0	0	I	intestinal
S058	female	46	1.54099	3	2	1	IVB	diffuse
S059	male	64	1.71016	1b	0	0	IA	mixed
S060	male	44	1.51816	4b	3a	0	IIIC	intestinal
S061	male	62	1.40371	3	1	0	IIB	diffuse
S062	female	69	1.38952	3	0	0	IIA	intestinal
S064	male	59	1.73872	4b	3	0	IVa	intestinal
